# Supplementary material for: Molecular Epidemiology of Rotavirus Strains in Symptomatic and Asymptomatic Children in Manhiça District, Southern Mozambique 2008–2019
Source: MDPI journal article supplement (doi:10.3390/v14010134), 2022-01-12
Supplement: s1 [file s1]

**Supplementary data.** Rotavirus genotypes distribution in MSD, LSD and community controls according to age strata

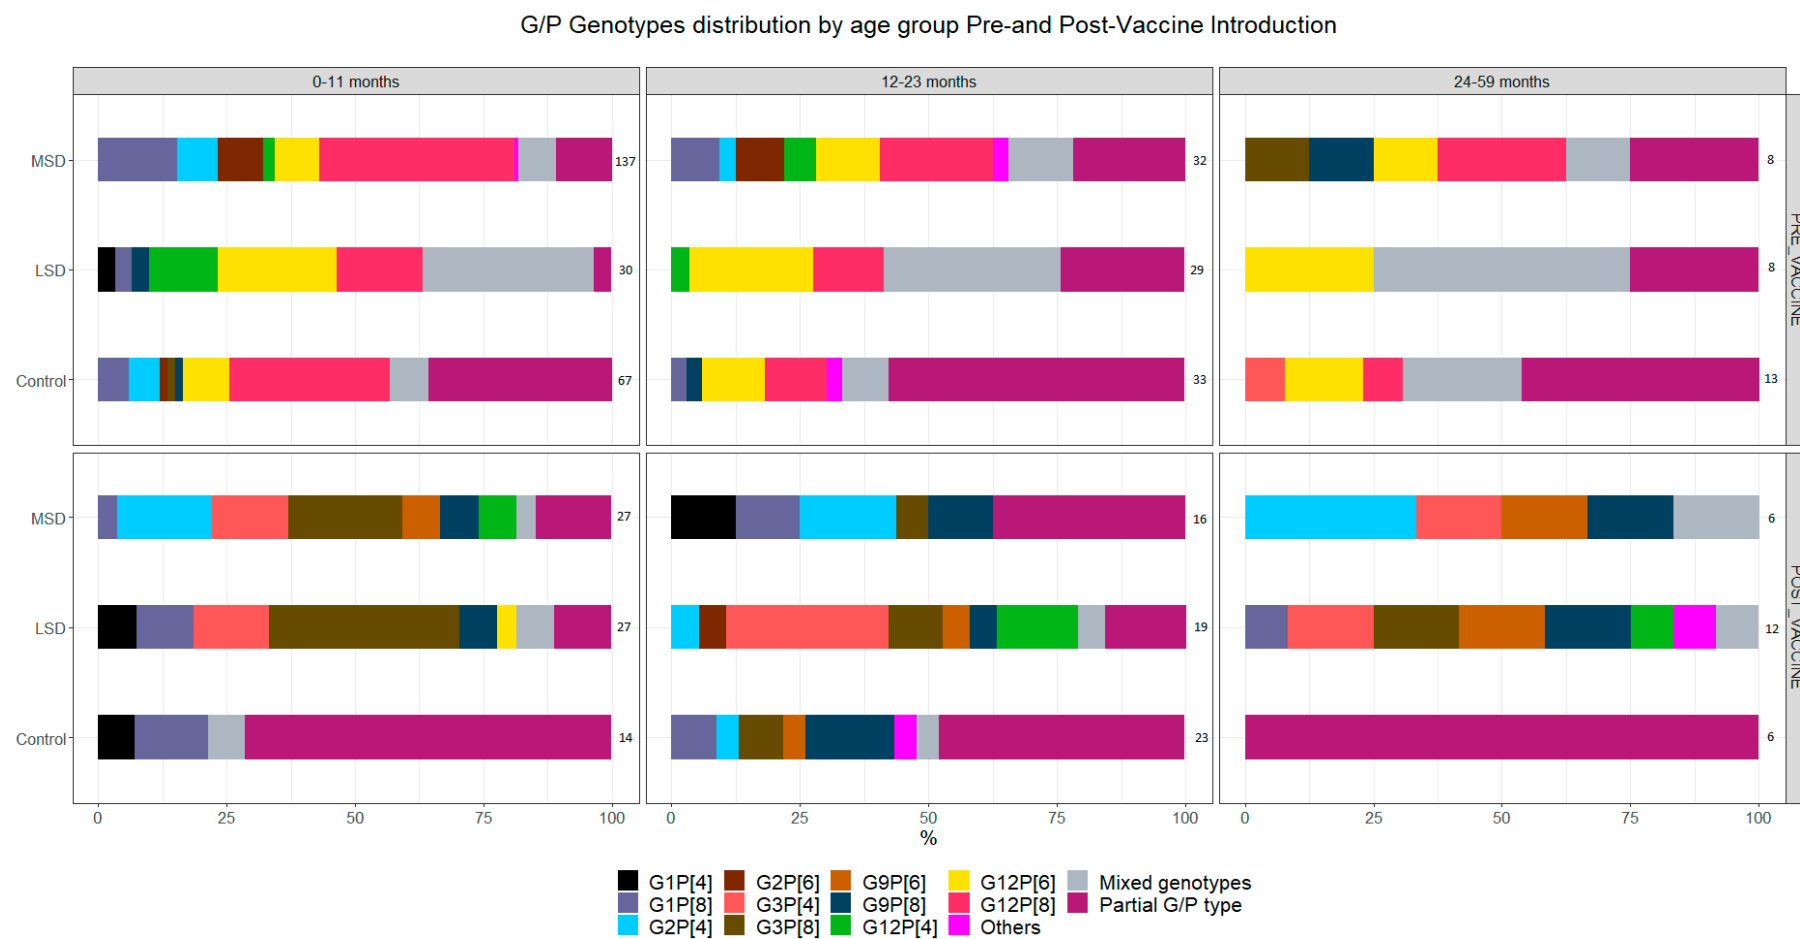

**Figure S1.** Distribution of rotavirus genotype combinations found in cases and controls in children < 5 years of age, among different age strata in Manhica (Maragra, Manhica District Hospital, Tanninga, Ilha Josina, Nwamatibjana, Malavele and Xinavane), Mozambique, 2008-2012 and 2016-2019. Colours represent each genotype combination specified. Data are presented as the proportion (%) of a specific genotype among the total of tested samples in each group (MSD, LSD, and controls) and each age strata. MSD-moderate-to-severe diarrhoea; LSD-less severe diarrhoea; controls: Health children from community.
